# Supplementary material
Source: publisher figshare collection journal article supplement (https://tandf.figshare.com/ndownloader/files/17784710)
Supplement: Supplementary file 1 [file 17784710]

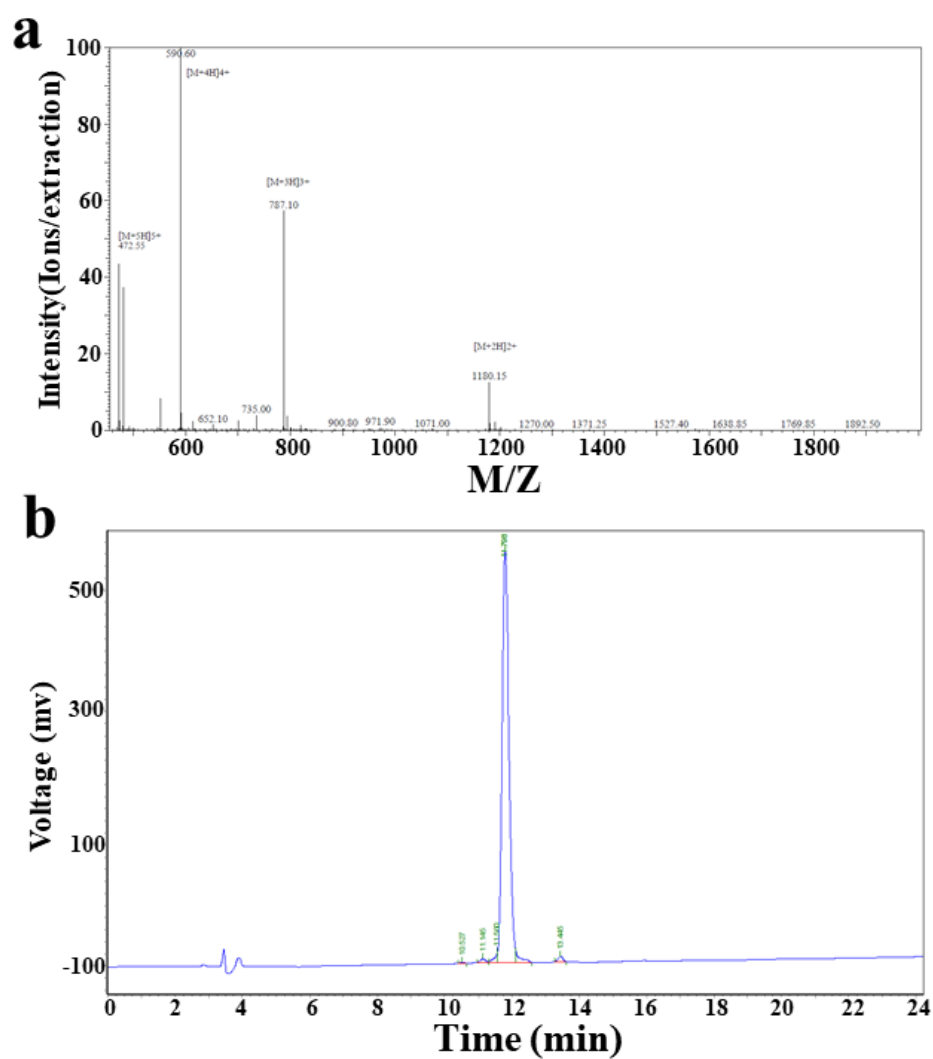

**Supplementary 1:** (a) The mass spectrum of chemically synthesized brevinin-GR23 was detected. (b) The purity of brevinin-GR23 was analyzed by RP-HPLC. The purity of brevinin-GR23 was more than 95%.
